# Supplementary figures and images for: Immune response to implant surface decontamination methods in the surgical peri-implantitis management
Source: Research Square preprint supplement (doi:10.21203/rs.3.rs-7575328/v1), 2025-10-10

## CONSORT 2010 Flow Diagram

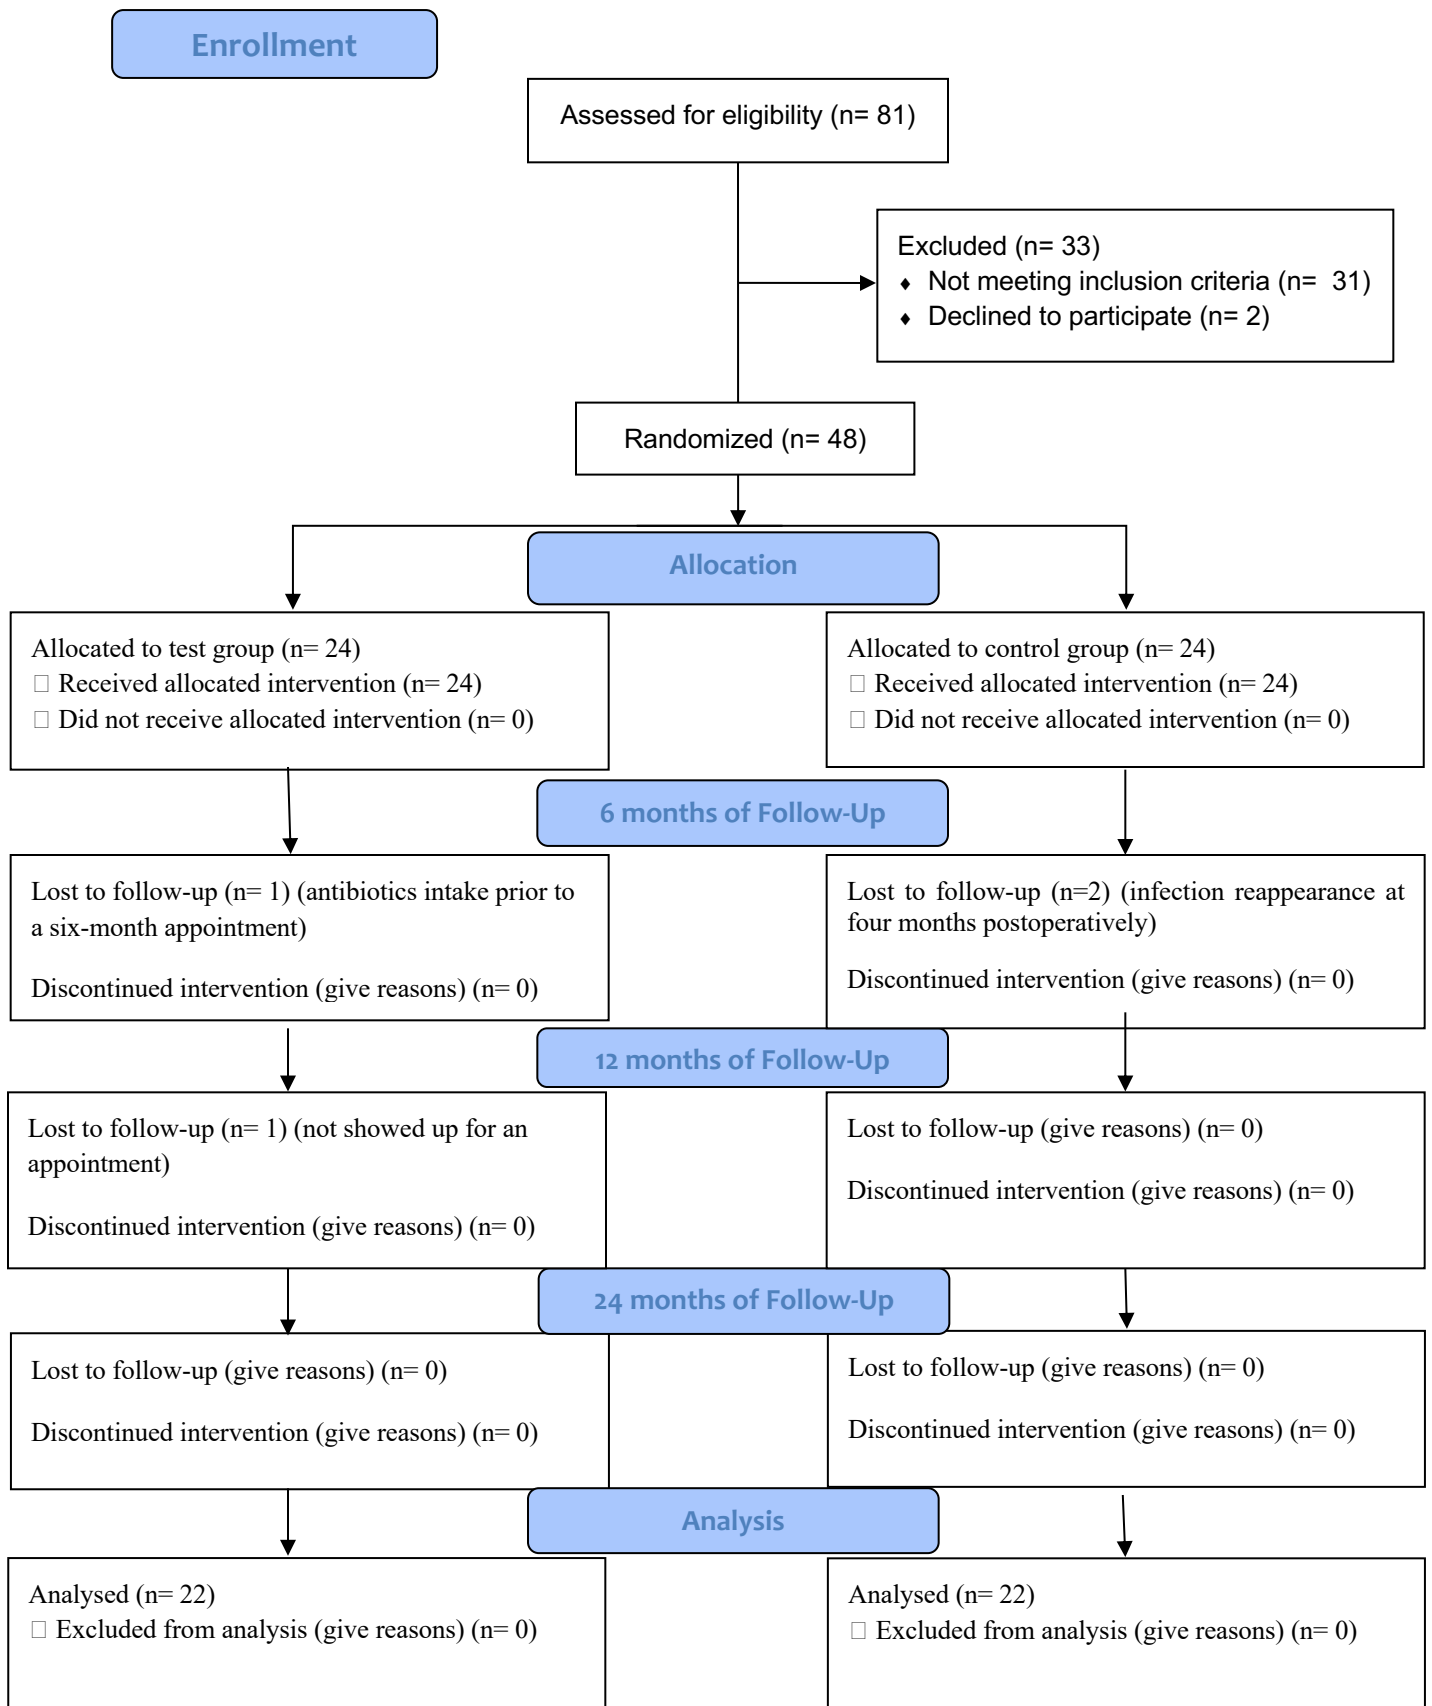

Supplement: Supplementary file 1 [file 18eca3530ada7c9e8d756954.pdf]
